# Supplementary material for: Obstetric pain correlates with postpartum depression symptoms: a pilot prospective observational study
Source: PubMed Central journal article supplement (PMC7178606; doi:10.1186/s12884-020-02943-7), 2020-04-22
Supplement: 12884_2020_2943_MOESM2_ESM.pdf [file 12884_2020_2943_MOESM2_ESM.pdf]

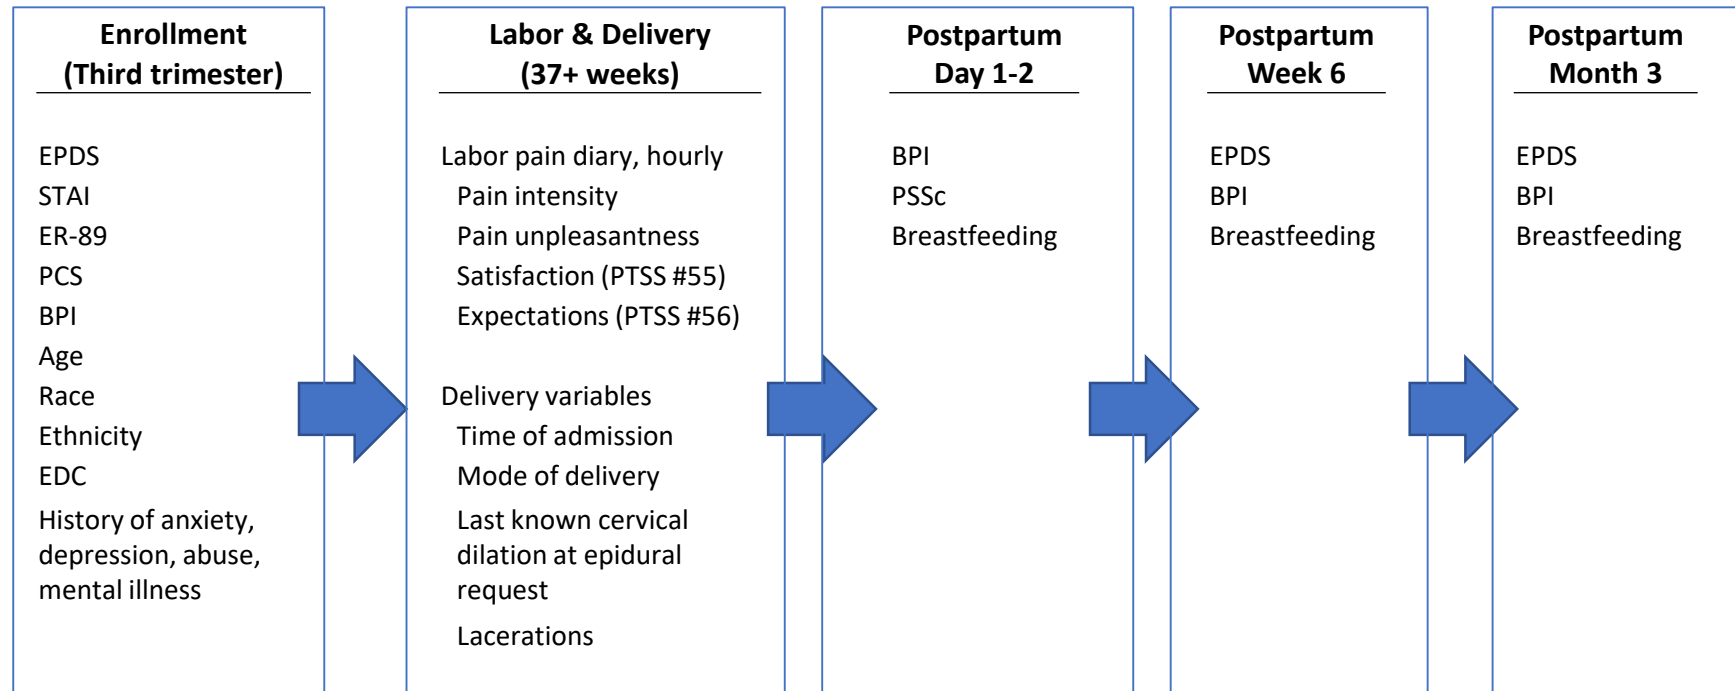

*EPDS: Edinburgh postnatal depression scale; STAI, state trait anxiety inventory; ER-89, ego-resiliency scale; PCS, pain catastrophizing scale; BPI, brief pain inventory; EDC, estimated date of confinement; PTSS, Pain treatment satisfaction scale; PSSc, perceived stress scale*
